# Supplementary material
Source: PubMed Central journal article supplement (PMC2964974)
Supplement: JCI42563sd.pdf [file JCI42563sd.pdf]

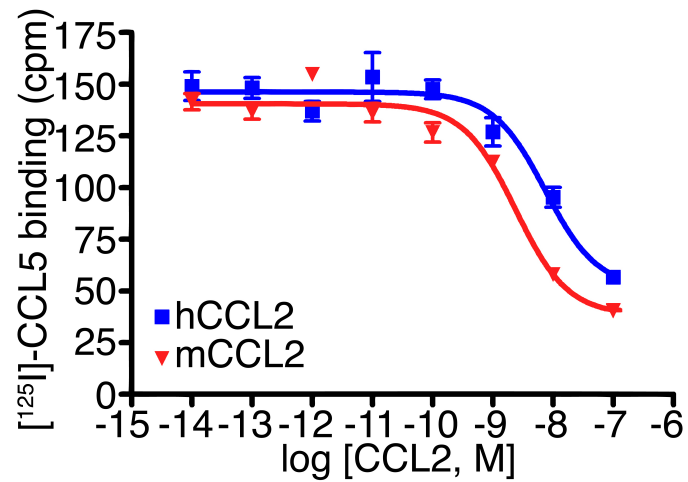

**Supplemental Figure 1. Similar affinities of mouse and human CCL2 for US28.** Competition binding curves determined with 0.25 nM [<sup>125</sup>I]-CCL5 in the presence of various concentrations of mouse or human CCL2. Whole cell binding was done on HEK293T cells transiently transfected with US28. Calculated equilibrium dissociation constants (pK<sub>i</sub>) are for human CCL2 8.5±0.2 and for mouse CCL2 9.0±0.1 (Results represent the mean ± S.E.M., n=3).
